# Supplementary material
Source: PubMed Central journal article supplement (PMC2698818)
Supplement: NIHMS116084-supplement-Supp__Fig_7.pdf [file NIHMS116084-supplement-Supp__Fig_7.pdf]

Frum et al. Supplemental Fig. S7

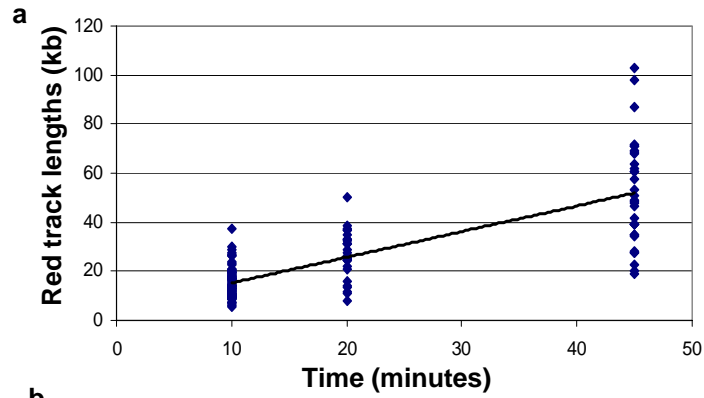

**b**

| Experiment                | Overall rate (kb/min) |
|---------------------------|-----------------------|
| Fig.2 NHF1 APH – First h  | 1.04                  |
| Fig.2 NHF1 APH – Fourth h | 1.73                  |
| Fig.3 NHF1 no APH         | 1.59                  |
| Fig.4 T98G no APH         | 1.49                  |
| Fig.5 T98G APH            | 1.21                  |
| Fig.6 NHF1 PBS            | 1.96                  |
| Fig.6 NHF1 Caffeine       | 1.3                   |
