# Supplementary material
Source: PubMed Central journal article supplement (PMC2698818)

Frum et al Supplemental Fig. S1

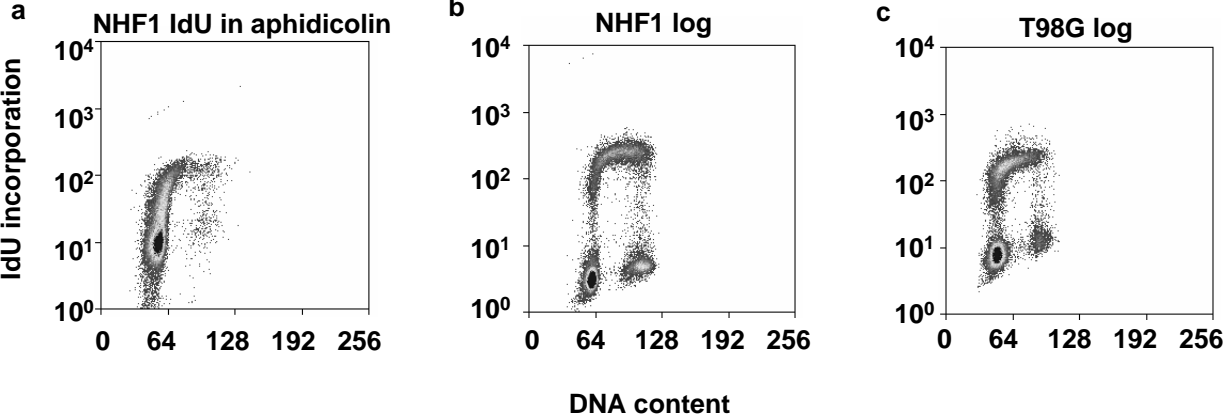

Supplement: NIHMS116084-supplement-Supp__Fig_1.pdf [file NIHMS116084-supplement-Supp__Fig_1.pdf]

Frum et al Supplemental Fig. S2

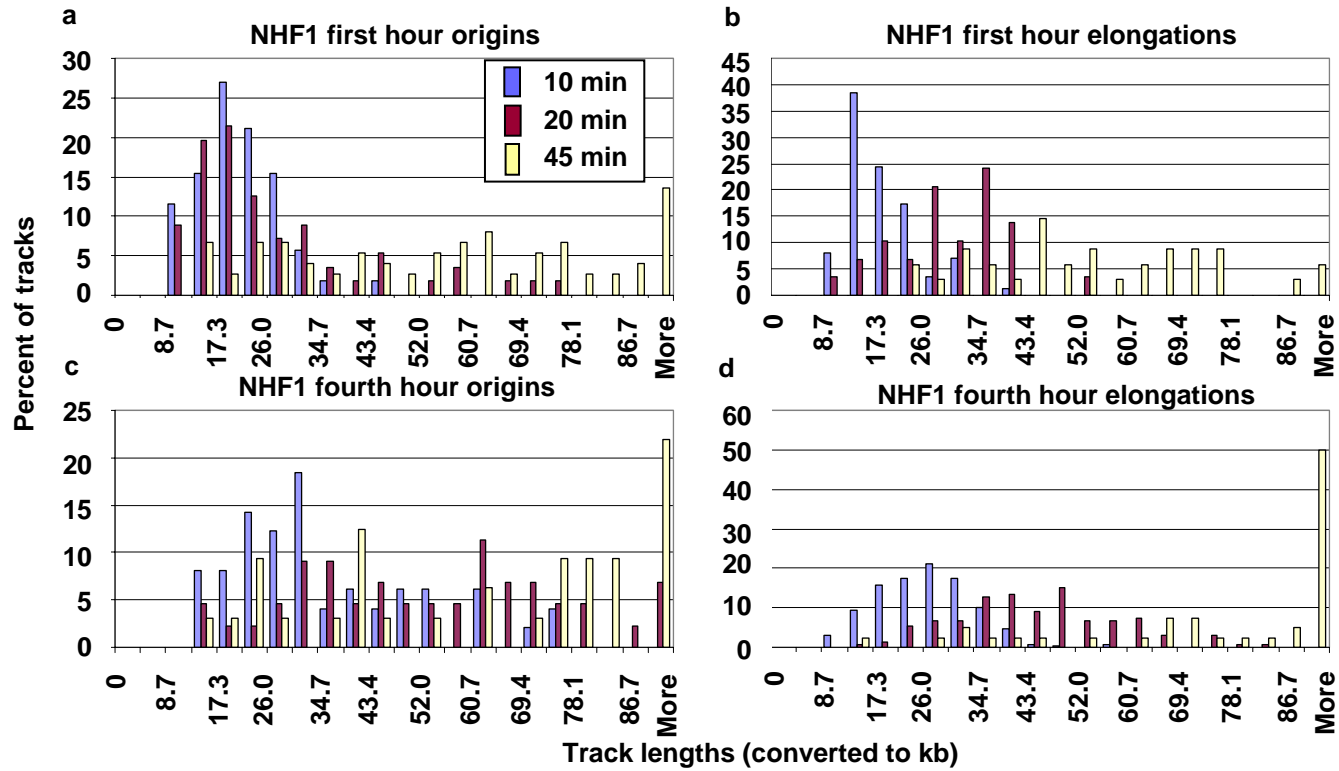

Supplement: NIHMS116084-supplement-Supp__Fig_2.pdf [file NIHMS116084-supplement-Supp__Fig_2.pdf]

Frum et al Supplemental Fig. S3

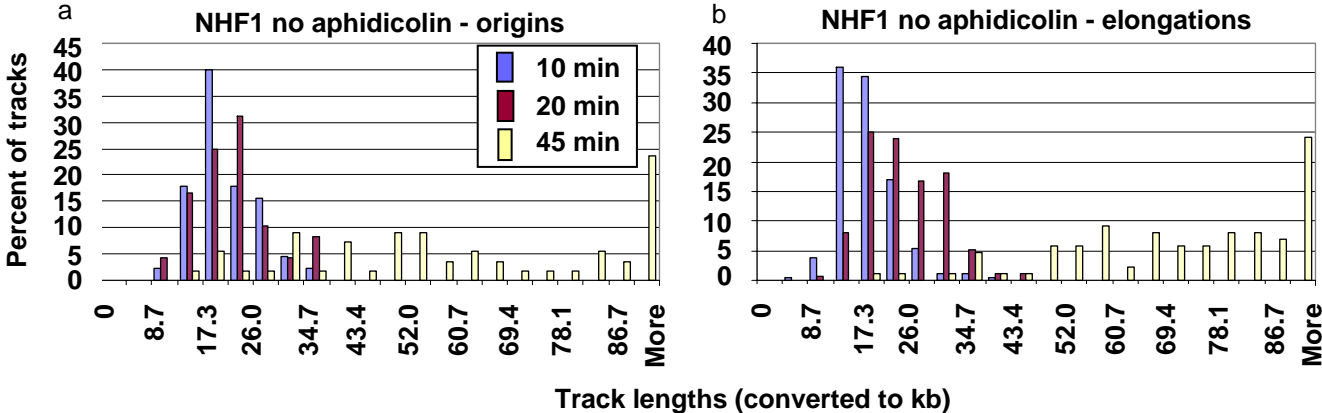

Supplement: NIHMS116084-supplement-Supp__Fig_3.pdf [file NIHMS116084-supplement-Supp__Fig_3.pdf]

Frum et al Supplemental Fig. S4

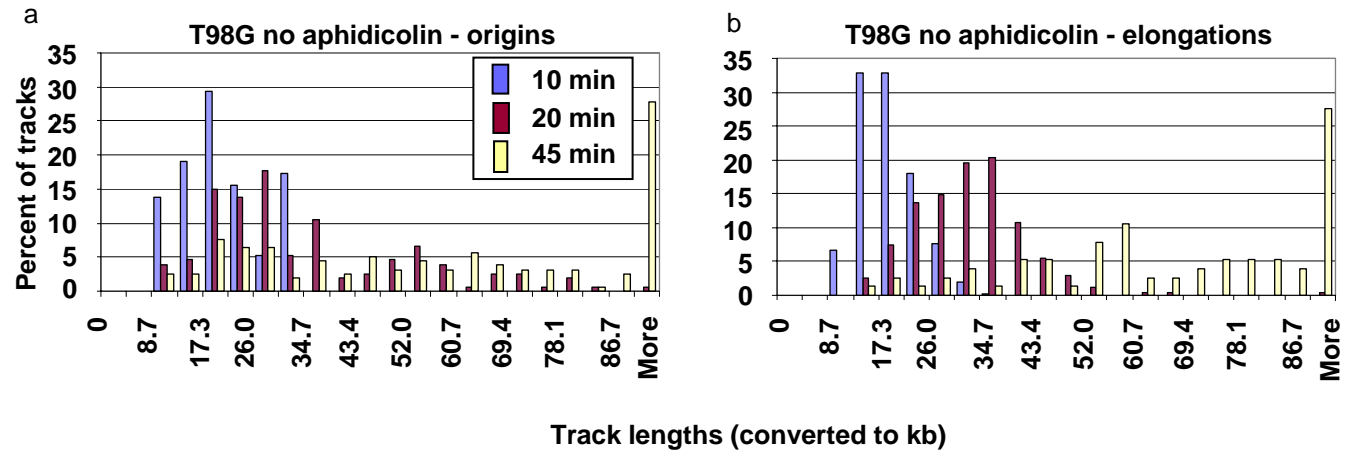

Supplement: NIHMS116084-supplement-Supp__Fig_4.pdf [file NIHMS116084-supplement-Supp__Fig_4.pdf]

Frum et al Supplemental Fig. S5

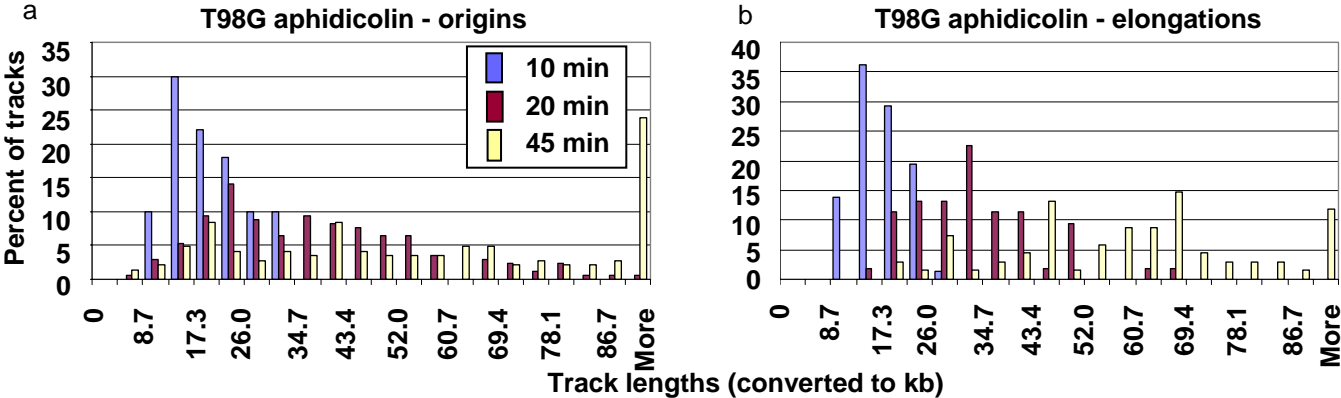

Supplement: NIHMS116084-supplement-Supp__Fig_5.pdf [file NIHMS116084-supplement-Supp__Fig_5.pdf]

Frum et al Supplemental Fig. S6

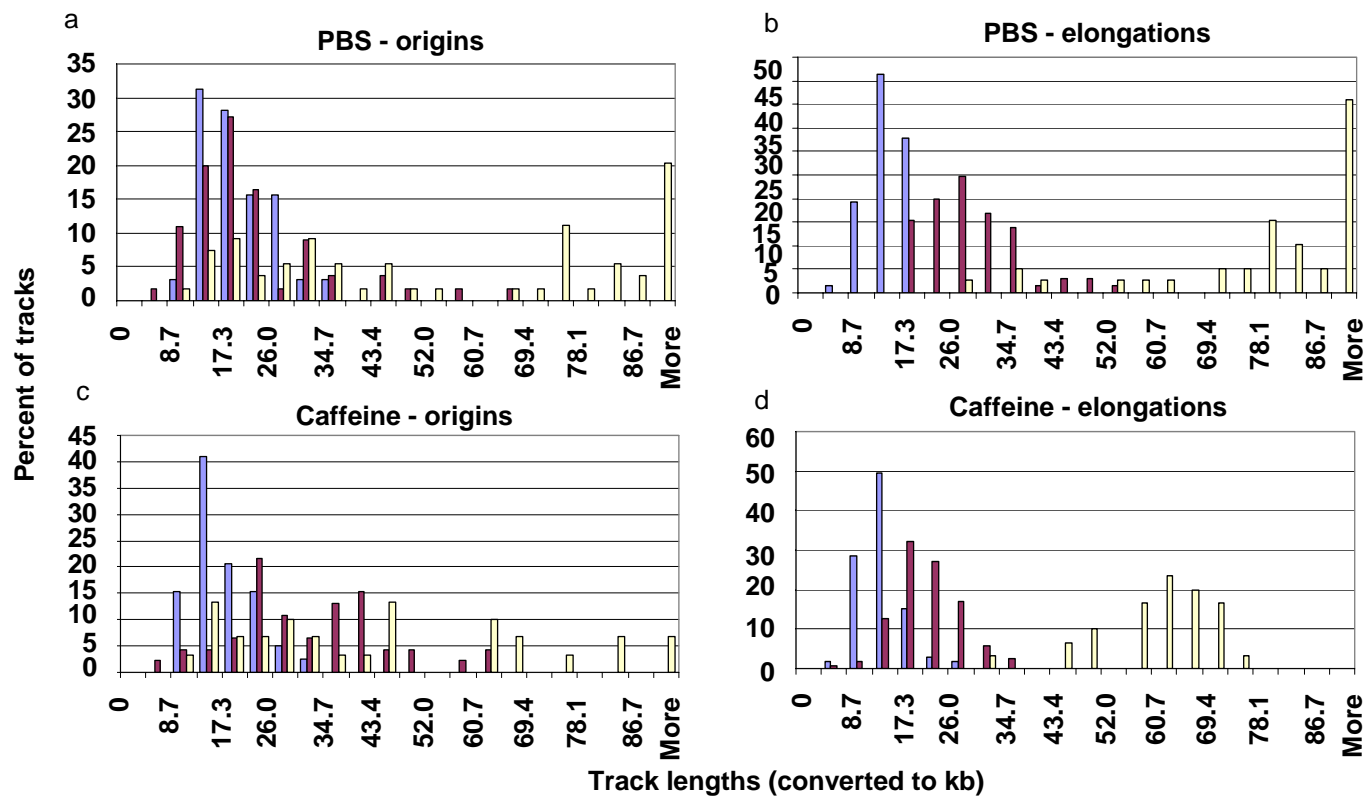

Supplement: NIHMS116084-supplement-Supp__Fig_6.pdf [file NIHMS116084-supplement-Supp__Fig_6.pdf]
